# Supplementary figures and images for: Unified mechanisms for self-RNA recognition by RIG-I Singleton-Merten syndrome variants
Source: eLife journal article supplement (doi:10.7554/elife.38958), 2018-07-26

A

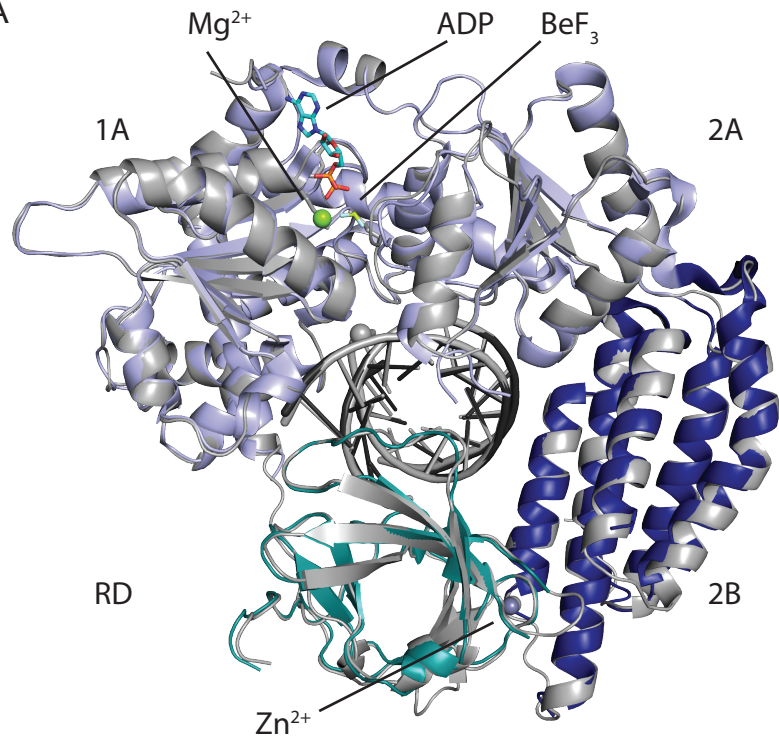

B

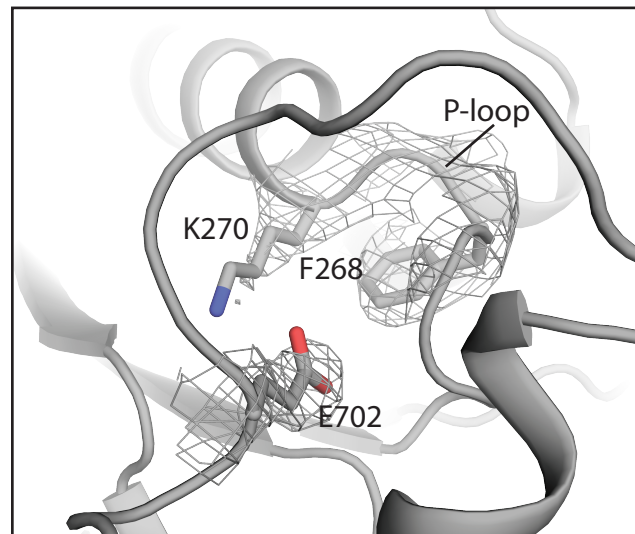

Supplement: supp [file elife-38958-supp-v1.zip]

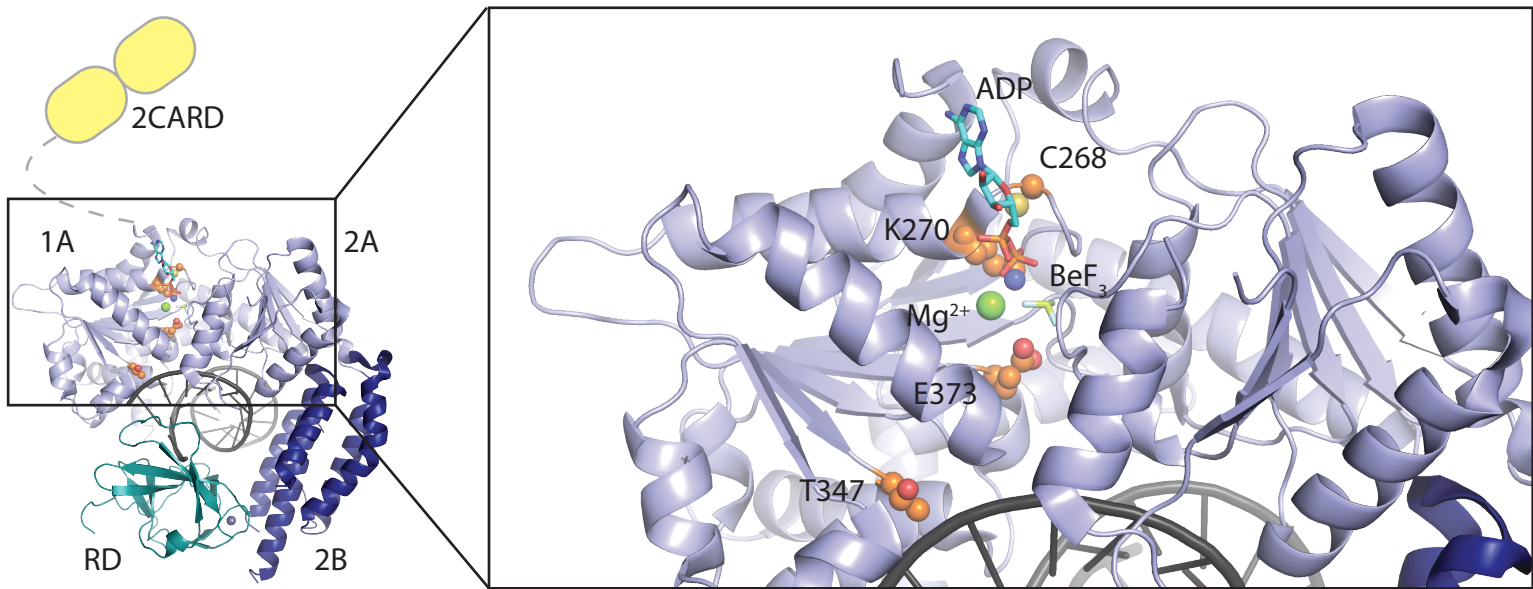

Supplement: supp [file elife-38958-supp-v1.zip]

A

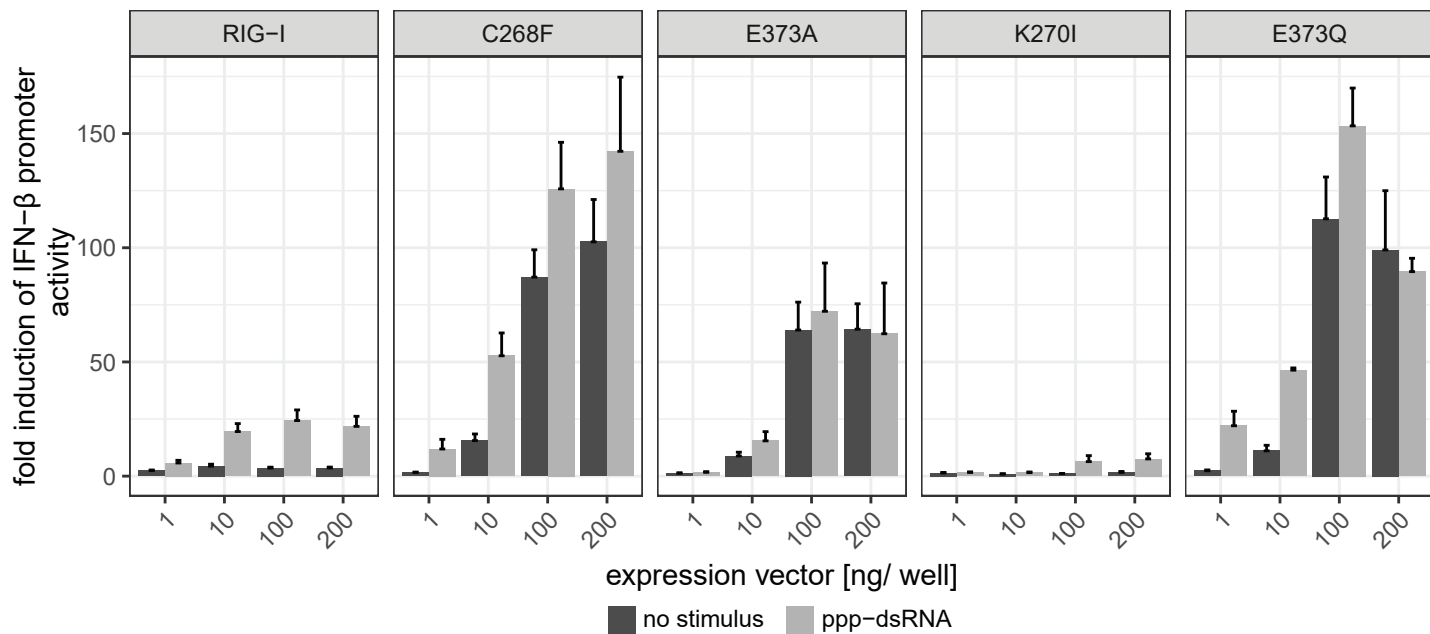

B

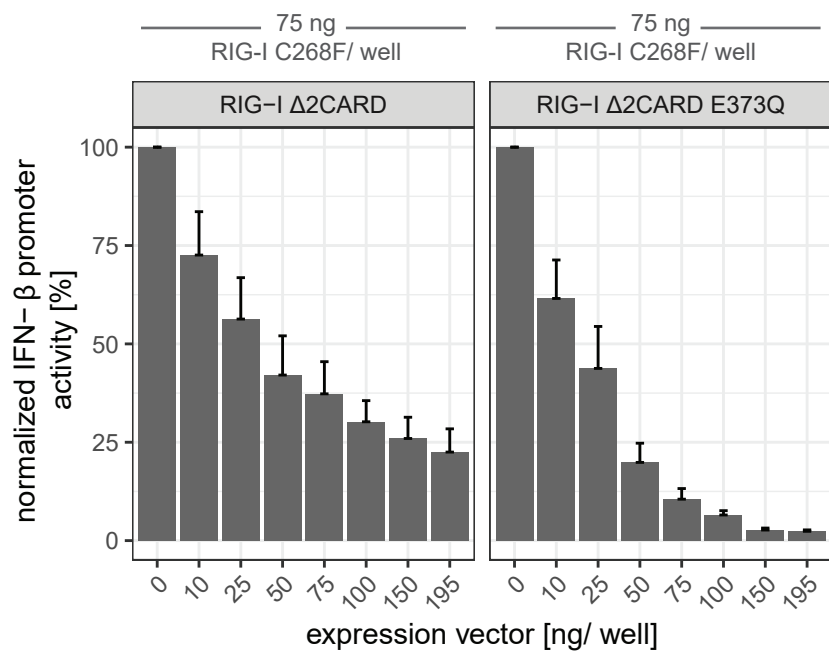

Supplement: supp [file elife-38958-supp-v1.zip]

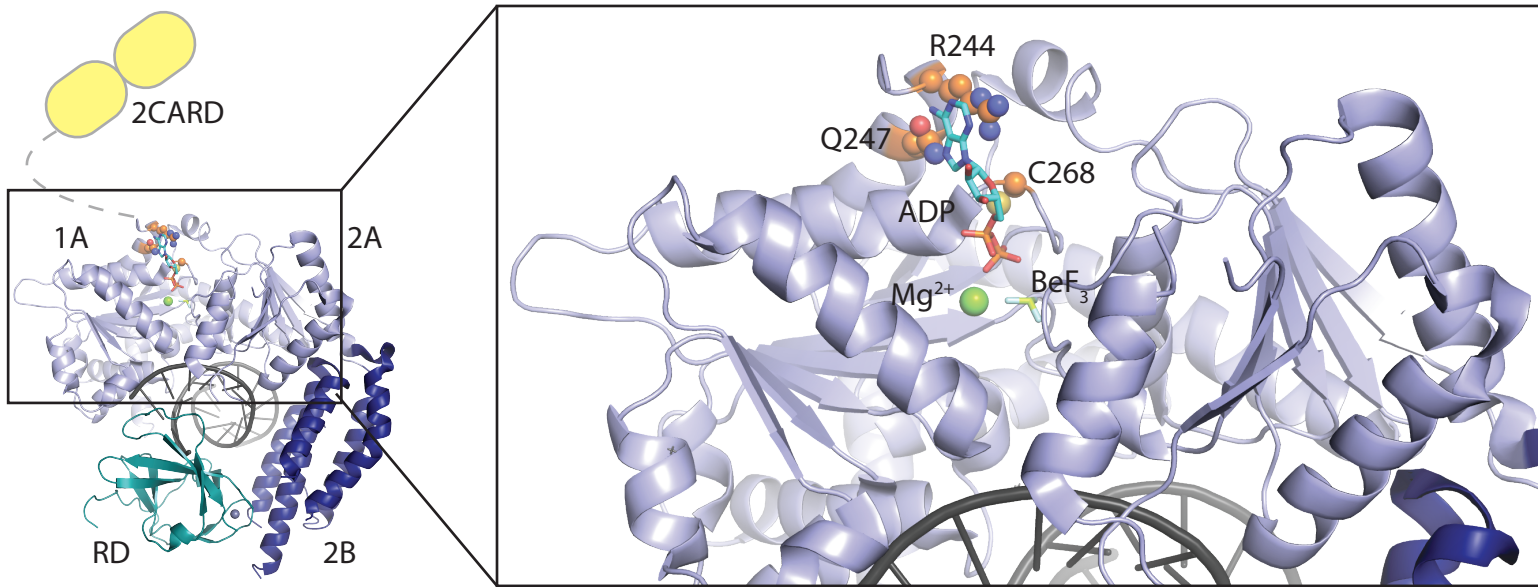

Supplement: supp [file elife-38958-supp-v1.zip]
